# Supplementary material for: Synthesis of porous Co3O4 nanonetworks to detect toluene at low concentration
Source: Royal Society of Chemistry journal article supplement (doi:10.1039/c4cp02961e), 2014-01-01
Supplement: c4cp02961e1.pdf [file c4cp02961e1.pdf]

## Supporting Information

### Synthesis of porous $\text{Co}_3\text{O}_4$ nanonetworks to detect toluene at low concentration

Changhui Zhao, Baoyu Huang, Jinyuan Zhou,\* and Erqing Xie\*

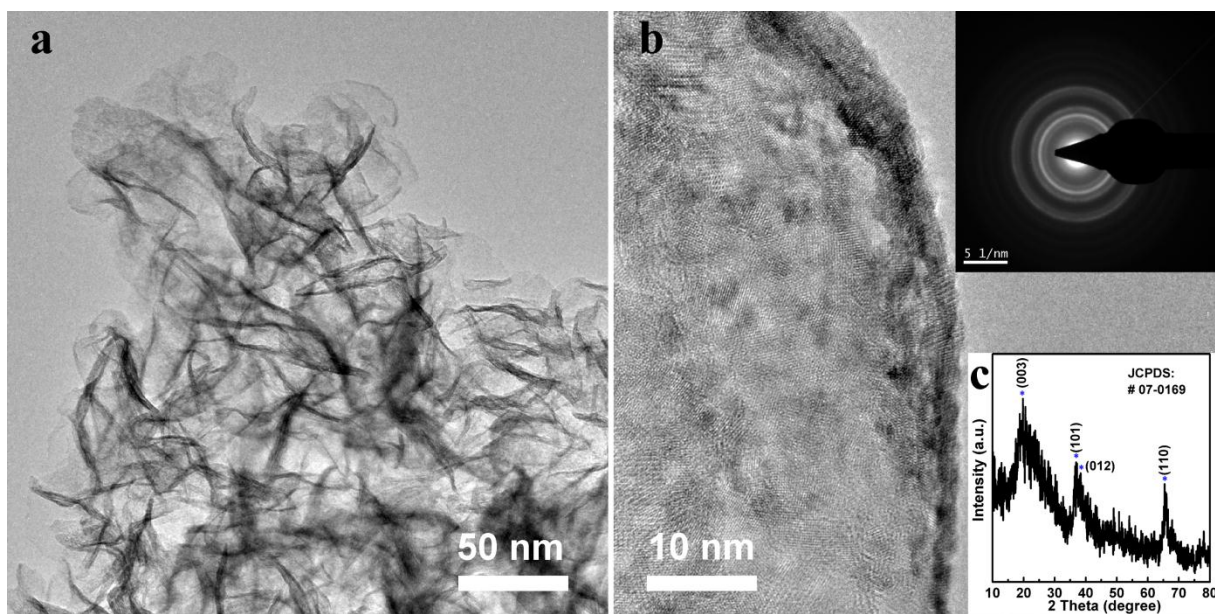

**Fig. S1.** (a and b) TEM and HRTEM images of precursor CoOOH nanosheets, (inset b is the corresponding SAED pattern), (c) XRD pattern of the CoOOH nanosheets.

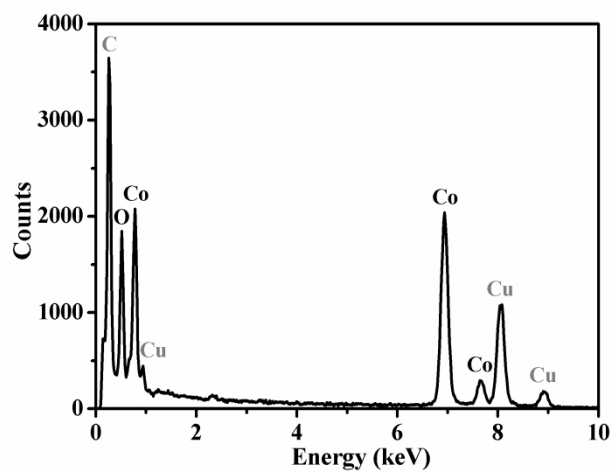

**Fig. S2.** An EDX spectrum of  $\text{Co}_3\text{O}_4$  NNWs. C and Cu peaks come from the copper-carbon grid of TEM.

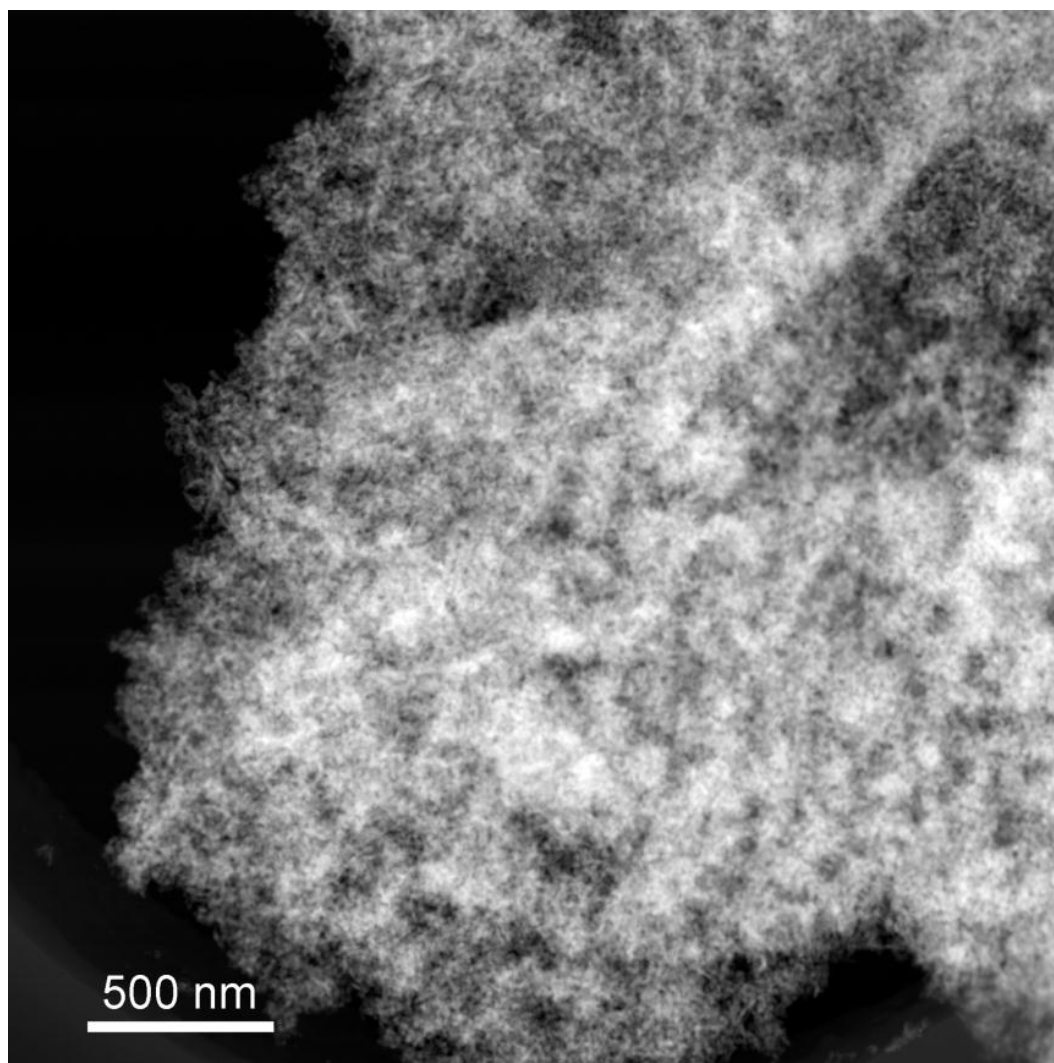

**Fig. S3.** HADF-STEM image of  $\text{Co}_3\text{O}_4$  products calcined at 400 °C.

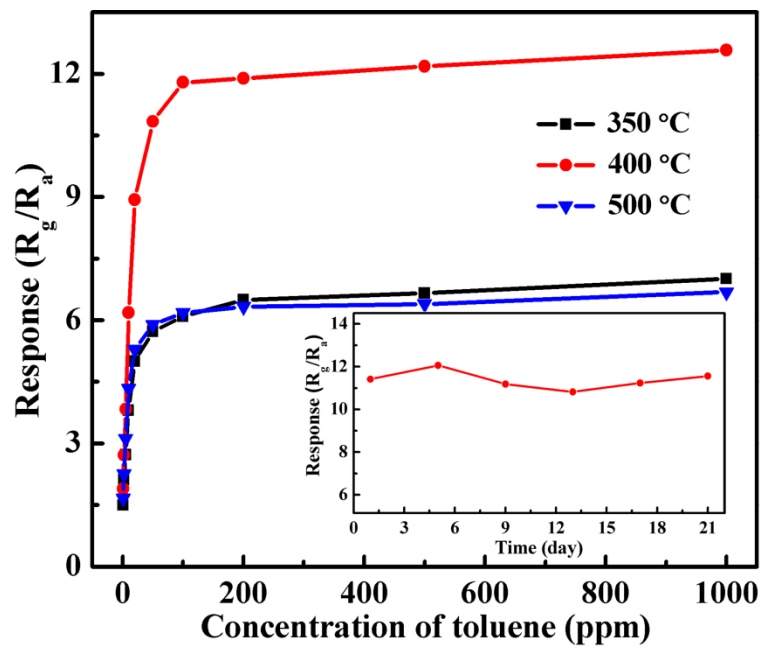

**Fig. S4.** Responses of the sensors *versus* the toluene concentrations range from 1 to 1000 ppm at an operating temperature of 150 °C, the inset is the stability of the sensor to 100 ppm toluene for three weeks.
